# Supplementary material for: Fluorescent molecularly imprinted nanoparticles with boronate affinity for selective glycoprotein detection
Source: Royal Society of Chemistry journal article supplement (doi:10.1039/c9tb02648g), 2020-01-01
Supplement: c9tb02648g1.pdf [file c9tb02648g1.pdf]

## SUPPLEMENTARY INFORMATION

**Table S1.** Molecular weight results of PBAN-GMA polymers with different initiator concentrations

| Amount of AIBN | $M_n$             | Polydispersity |
|----------------|-------------------|----------------|
| 1%             | $9.9 \times 10^3$ | 1.6            |
| 2%             | $8.8 \times 10^3$ | 1.5            |
| 4%             | $6.9 \times 10^3$ | 1.9            |

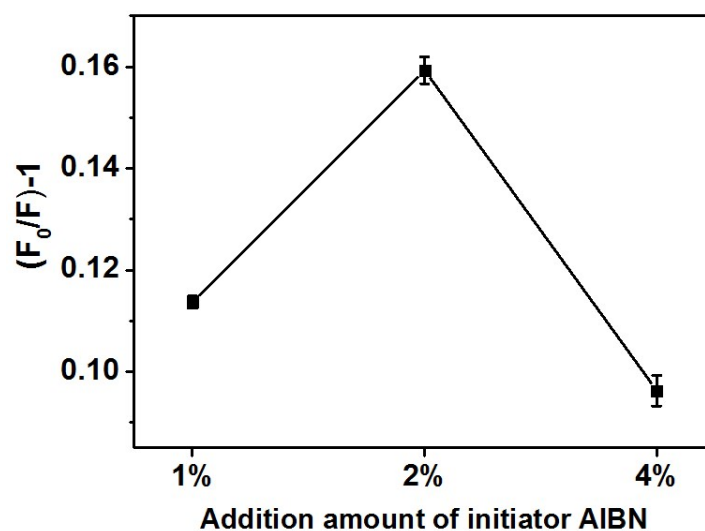

**Figure S1.** Effect of initiator addition amounts in the polymerization process of PBAN-GMA on the fluorescence response of B-FMIP NPs

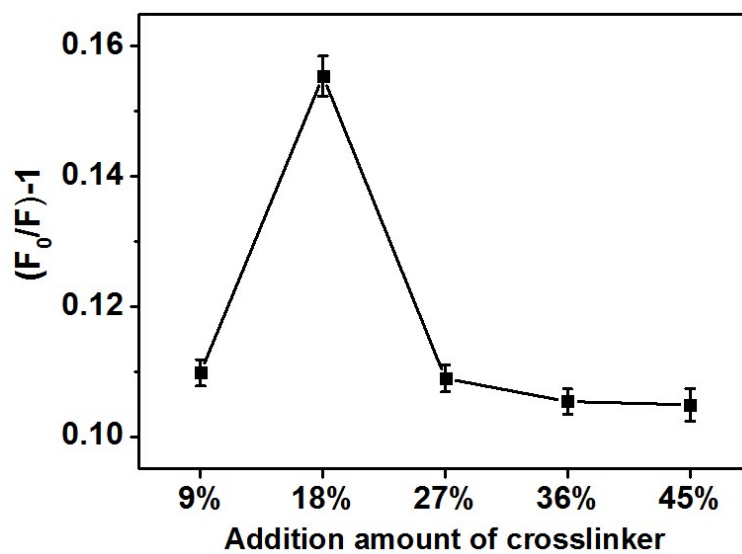

**Figure S2.** The effect of crosslinker amount on the fluorescence response of B-FMIP NPs
